# Supplementary material for: Transcription factor CitERF71 activates the terpene synthase gene CitTPS16 involved in the synthesis of E-geraniol in sweet orange fruit
Source: PubMed Central journal article supplement (PMC5853461; doi:10.1093/jxb/erx316), 2017-09-07
Supplement: erx316_suppl_supplementary_tables_figures.pdf [file erx316_suppl_supplementary_tables_figures.pdf]

**Transcription factor CitERF71 activates terpene synthase CitTPS16 that is associated with the synthesis of E-geraniol in sweet orange fruit**

**Xiang Li, Yaying Xu, Shuling Shen, Xueren Yin, Harry Klee, Bo Zhang<sup>†</sup>, Kunsong Chen**

<sup>†</sup>Correspondence: [bozhang@zju.edu.cn](mailto:bozhang@zju.edu.cn)

**Supplementary files:**

**Table S1.** Primers used in the present study.

**Table S2.** Complementary 59 bp oligonucleotides for EMSA.

**Fig. S1.** SDS-PAGE analysis of recombinant *CitTPS16* protein.

**Fig. S2.** *In vivo* interaction between 48 CitERFs and *CitTPS16* promoter.

**Fig. S3.** Phylogenetic analysis of plant AP2/ERF transcription factors.

**Fig. S4.** Sequence alignment of AP2/ERF transcription factors.

**Table S1.** Primers used in the present study.

| <b>Primers</b>    | <b>Sequence(5'-3')</b>                            | <b>Description</b>                               |
|-------------------|---------------------------------------------------|--------------------------------------------------|
| CitTPS16F         | GGGTGGCCAAGCATGATATT                              | RT-QPCR of <i>CitTPS16</i>                       |
| CitTPS16R         | GATAGGGTTCATGTCTGGTCC                             | RT-QPCR of <i>CitTPS16</i>                       |
| CitERF71F         | ATGTTGAGCCCCGGTTAG                                | RT-QPCR of <i>CitERF71</i>                       |
| CitERF71R         | GTCTAAAGGACACAACGGATGAT                           | RT-QPCR of <i>CitERF71</i>                       |
| Citrus actin F    | CATCCCTCAGCACCTTCC                                | RT-QPCR of Citrus actin                          |
| Citrus actin R    | CCTCTTCACGATTCCAACC                               | RT-QPCR of Citrus actin                          |
| pET-CitTPS16F     | <u>CTGCAG</u> GTAGGCGATCTGCCGATTACGGG             | Subclone to pET Vector of <i>CitTPS16</i>        |
| pET-CitTPS16R     | <u>GAATTC</u> GCCTCTTAGTGTATTGCTTGCAC             | Subclone to pET Vector of <i>CitTPS16</i>        |
| SK-CitTPS16F      | CGCGGTG <u>GCGGCCGC</u> ATGGCTCTTAATCTGCT         | Subclone to pGreen-SK Vector of <i>CitTPS16</i>  |
| SK-CitTPS16R      | GGGGGATCC <u>ACTAGT</u> TTAGTGTATTGCTTGCAC        | Subclone to pGreen-SK Vector of <i>CitTPS16</i>  |
| pET-CitERF71F     | ATCACAACG <u>CTGCAG</u> GATGAACAGAGAAAATATG       | Subclone to pET Vector of <i>CitERF71</i>        |
| pET-CitERF71R     | CGGCCGCCA <u>GAATTC</u> GCTCACCCGGGTCTAAAGG       | Subclone to pET Vector of <i>CitERF71</i>        |
| SK-CitERF71F      | ATGAACAGAGAAAATATGTCCGA                           | Subclone to pGreen-SK Vector of <i>CitERF71</i>  |
| SK-CitERF71R      | ACAGGAAATCTGGGCCCACT                              | Subclone to pGreen-SK Vector of <i>CitERF71</i>  |
| AD-CitERF71F      | GAGGCCAGT <u>GAATTC</u> ATGAACAGAGAAAATATGTCCG    | Subclone to pGADT7 AD Vector of <i>CitERF71</i>  |
| AD-CitERF71R      | GAGCTCGAT <u>GGATCC</u> TCACCCGGGTCTAAAGGACA      | Subclone to pGADT7 AD Vector of <i>CitERF71</i>  |
| pAbAi-CitTPS16F   | CTTGAATTC <u>GAGCTC</u> GGGTATATGACCGCTATATGTGTG  | Subclone to pAbAi Vector of <i>CitTPS16</i>      |
| pAbAi-CitTPS16R   | TGCCTCGAG <u>GTCGAC</u> CATGACTTAGAATATAATTTCAAGG | Subclone to pAbAi Vector of <i>CitTPS16</i>      |
| LUC-CitTPS16(P0)F | TTCTAGAG <u>GCGGCCGC</u> GGGTATATGACCGCTATATGTGTG | Subclone to pGreen-LUC Vector of <i>CitTPS16</i> |
| LUC-CitTPS16(P1)F | TTCTAGAG <u>GCGGCCGC</u> CCAATATAACCAATTCGGTTCAGT | Subclone to pGreen-LUC Vector of <i>CitTPS16</i> |
| LUC-CitTPS16(P2)F | TTCTAGAG <u>GCGGCCGC</u> CGTGTCAAGCTCTCATAGAGAGA  | Subclone to pGreen-LUC Vector of <i>CitTPS16</i> |

|                   |                                                |                                                  |
|-------------------|------------------------------------------------|--------------------------------------------------|
| LUC-CitTPS16(P3)F | TTCTAGAG <u>GCGGCCGC</u> CACACATGTCATCACATCAT  | Subclone to pGreen-LUC Vector of <i>CitTPS16</i> |
| LUC-CitTPS16(P4)F | TTCTAGAG <u>GCGGCCGC</u> GTCAATGAGTCACATGTCATG | Subclone to pGreen-LUC Vector of <i>CitTPS16</i> |
| LUC-CitTPS16R     | TGGCGTCTT <u>CCATGG</u> CTTAGAATATAATTTCAAGG   | Subclone to pGreen-LUC Vector of <i>CitTPS16</i> |

The restriction enzyme sites are labeled.

**Table S2.** Complementary 59 bp oligonucleotides for EMSA.

| <b>Name</b>              | <b>Sequence (5'-3')</b>                                               |
|--------------------------|-----------------------------------------------------------------------|
| GCC-box-like sequence 1  | GAATGGGCGATAGAGCTCATACTT <u>ACCCGCC</u> TCTCTTCACATTCAAACCTTCTAATATTA |
| mGCC-box-like sequence 1 | GAATGGGCGATAGAGCTCATACTT <u>AAAAGCC</u> TCTCTTCACATTCAAACCTTCTAATATTA |
| GCC-box-like sequence 2  | AATTTACAAAATTATAGAAGTCAAATTACGACGTCGTAAATCT <u>GGCGGG</u> ACTTTAATGG  |
| mGCC-box-like sequence 2 | AATTTACAAAATTATAGAAGTCAAATTACGACGTCGTAAATCT <u>GGCAAA</u> ACTTTAATGG  |

The GCC-like-box motif and mGCC-like-box motif are labeled.

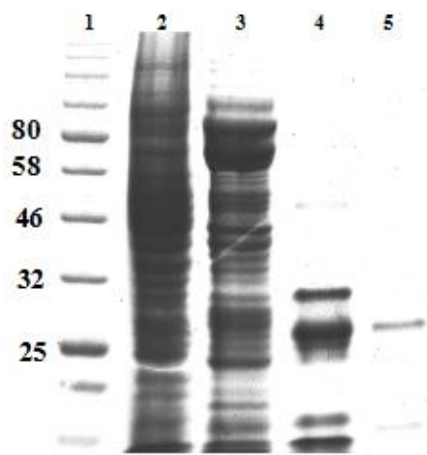

**Fig. S1** SDS-PAGE analysis of recombinant CitTPS16 protein. M: molecular weight markers ranging from 10 to 180 kDa, (1) Marker, (2~5) recombinant CitTPS16 proteins.

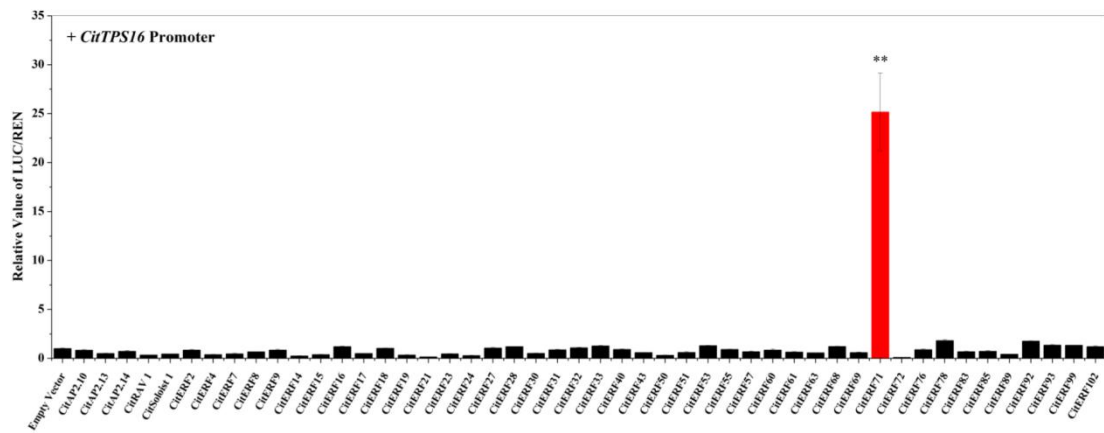

**Fig. S2** *In vivo* interaction between ethylene-responsive factors and *CitTPS16* promoter. Associations of TFs and promoter were obtained from transient assays in *N. benthamiana* leaves. For the transcription factor-promoter interactions, three independent experiments were performed (four replicates in each experiment). Firefly luciferase (LUC) and renilla (REN) luciferase were assayed 3d after infiltration. The ratio of LUC/REN to the empty vector plus promoter was used as a calibrator (set as 1). Error bars indicate SE from four biological replicates (\*\* $P < 0.01$ ).

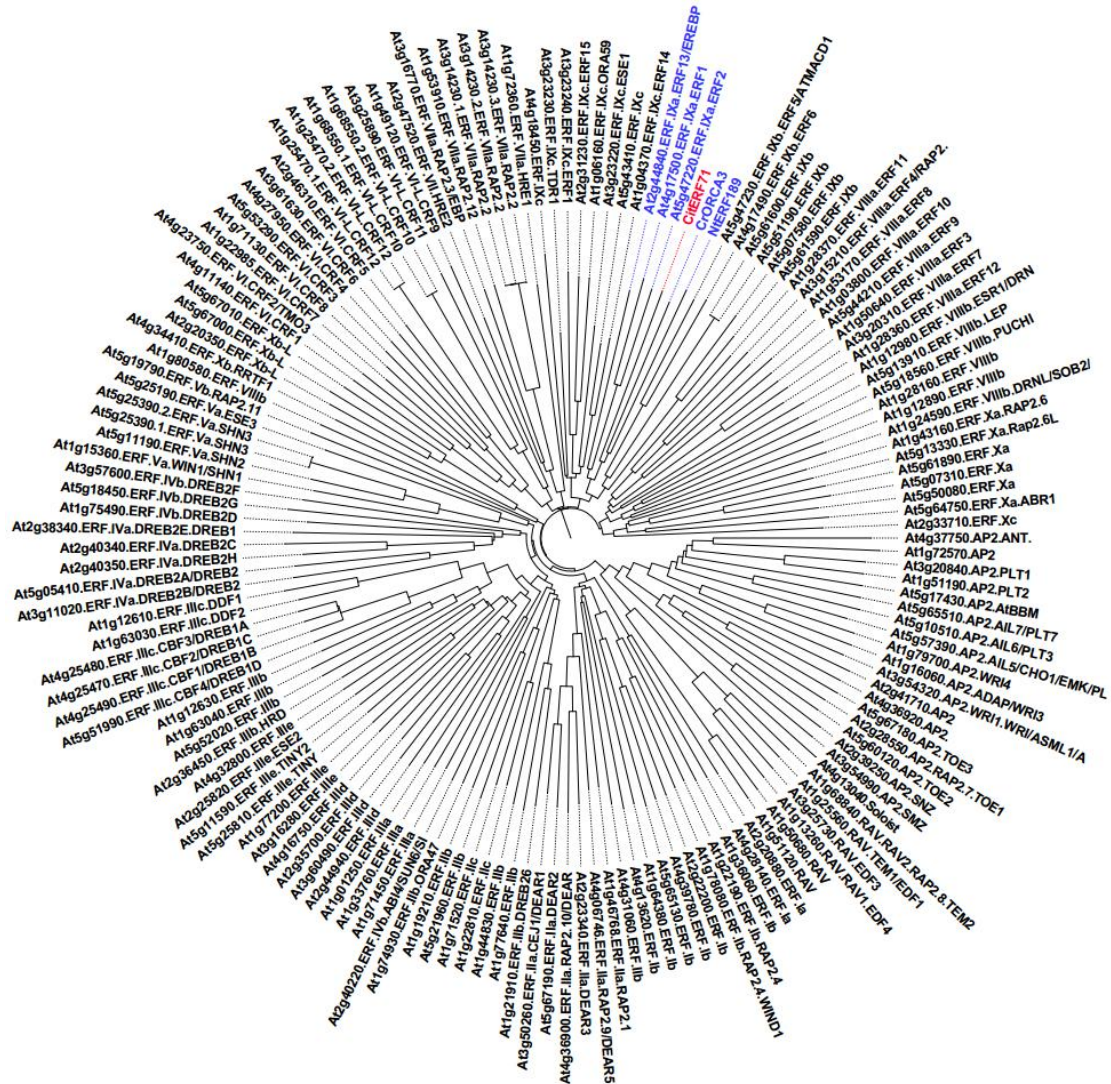

**Fig. S3.** Phylogenetic analysis of plant AP2/ERF genes. CitERF71 was donated as red font. The amino acid sequences were obtained from The Arabidopsis Information Resource or the National Center for Biotechnology Information database. The amino acid sequences were analyzed with ClustalX (v. 1.81).

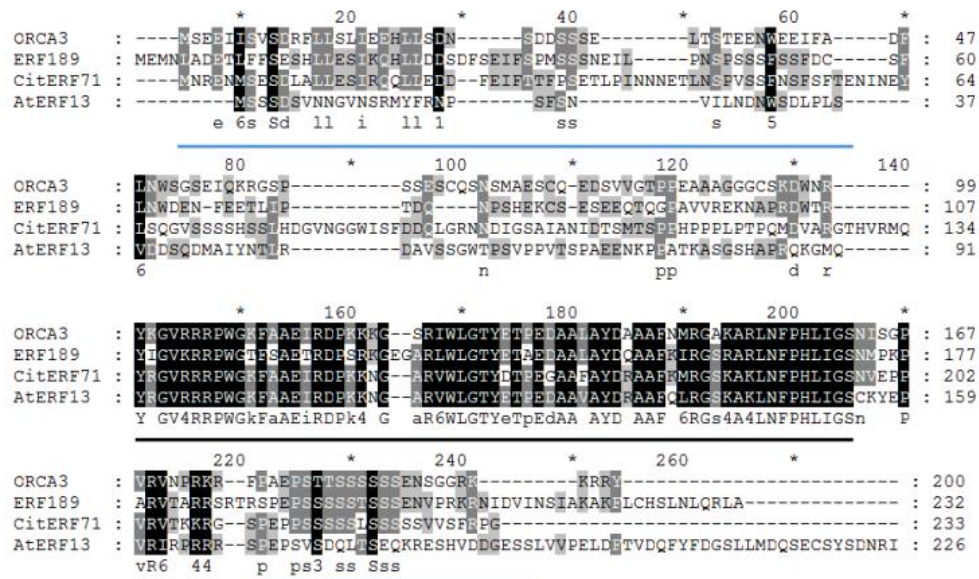

**Fig. S4** Sequence alignment of AP2/ERF transcription factors. Alignment of protein sequences of *N. tabacum* ERF189, *C. roseus* ORCA3, Arabidopsis AtERF13 and Newhall sweet orange CitERF71. Residues identical in at least two sequences are shaded in black, and dashes indicate gaps introduced to maximize the alignment. The AP2/ERF DNA-binding domain is underlined (black), the N-terminal Ser/Asp/Glu-rich acidic domain (blue), and the short Ser-stretch (green).
